# Supplementary material for: Functional Analysis of Autoantibody Signatures in Rheumatoid Arthritis
Source: MDPI journal article supplement (doi:10.3390/molecules27041452), 2022-02-21
Supplement: s1 [file s1]

## Supplementary Table S3

Supplementary Table S3: Top 25 enriched pathways for DIRAGs higher reactive in established PIA. Out of the 988 cleaned IDs, 673 were found in Reactome pathway browser. Names (linked to Reactome pathway browser), found of total entities, their p-value and FDRs are given, the number of found out of total reactions, the found genesymbols within the pathway and results of the overrepresentation analysis for the complete chip are given (continued page 7-10).

| Pathway name                                                                               | found/total entities | entities p-value  | entities FDR (BH) | found/total reactions | GeneSymbols found                                                                                                                                                                                                          | found/total entities (16k) | rank (16k) |
|--------------------------------------------------------------------------------------------|----------------------|-------------------|-------------------|-----------------------|----------------------------------------------------------------------------------------------------------------------------------------------------------------------------------------------------------------------------|----------------------------|------------|
| <a href="#">Endosomal/vacuolar pathway</a>                                                 | 36/82                | $1.33 * 10^{-15}$ | $2.08 * 10^{-12}$ | 3/4                   | HLA-A, HLA-C, HLA-E                                                                                                                                                                                                        | 74/82                      | 1          |
| <a href="#">Antigen Presentation: Folding, assembly and peptide loading of class I MHC</a> | 37/102               | $1.68 * 10^{-13}$ | $1.31 * 10^{-10}$ | 13/16                 | HLA-A, HLA-C, HLA-E, SEC13                                                                                                                                                                                                 | 84/102                     | 2          |
| <a href="#">Interferon alpha/beta signaling</a>                                            | 50/184               | $5.11 * 10^{-13}$ | $2.66 * 10^{-10}$ | 14/20                 | ADAR, HLA-C, HLA-E, IFITM1, IRF4, ISG15, PSMB8, TYK2                                                                                                                                                                       | 120/186                    | 41         |
| <a href="#">ER-Phagosome pathway</a>                                                       | 46/165               | $1.86 * 10^{-12}$ | $7.29 * 10^{-10}$ | 5/10                  | HLA-A, HLA-C, HLA-E, MAL, PSMA1, PSMA2, PSMB1, PSMB8, PSMC2, PSMC4, PSMD10, PSMD13, UBC                                                                                                                                    | 122/173                    | 3          |
| <a href="#">Interferon Signaling</a>                                                       | 77/392               | $4.17 * 10^{-12}$ | $1.31 * 10^{-9}$  | 33/66                 | ADAR, EIF2AK2, EIF4E, EIF4G1, EIF4G2, FLNA2, FLNB, GBP5, GBP6, HLA-A, HLA-C, HLA-DPB1, HLA-E, IFITM1, IRF4, ISG15, KPNA2, MAPK3, NUP107, NUP210, NUP62, PSMB8, SEC13, SP140L, STAT4, TRIM22, TRIM8, TYK2, UBA7, UBC, UBE2N | 205/394                    | 1102       |
| <a href="#">Antigen processing-Cross presentation</a>                                      | 47/187               | $8.84 * 10^{-9}$  | $8.84 * 10^{-9}$  | 10/23                 | HLA-A, HLA-C, HLA-E, MAL, NCF2, PSMA1, PSMA2, PSMB1, PSMB8, PSMC2, PSMC4, PSMD10, PSMD13, UBC                                                                                                                              | 127/195                    | 22         |
| <a href="#">Interferon gamma signaling</a>                                                 | 52/250               | $4.69 * 10^{-7}$  | $4.69 * 10^{-7}$  | 2/15                  | GBP5, GBP6, HLA-A, HLA-C, HLA-DPB1, HLA-E, IRF4, SP140L, TRIM22, TRIM8                                                                                                                                                     | 138/250                    | 572        |

|                                                                                   |           |                       |                       |         |                                                                                                                                                                                                                                                                                                                                                                                                                                                                                                                                                                                                                                                                                                        |          |      |
|-----------------------------------------------------------------------------------|-----------|-----------------------|-----------------------|---------|--------------------------------------------------------------------------------------------------------------------------------------------------------------------------------------------------------------------------------------------------------------------------------------------------------------------------------------------------------------------------------------------------------------------------------------------------------------------------------------------------------------------------------------------------------------------------------------------------------------------------------------------------------------------------------------------------------|----------|------|
| <a href="#">Cytokine Signaling in Immune System</a>                               | 160/1,245 | $1.73 \times 10^{-6}$ | $1.73 \times 10^{-6}$ | 402/699 | ADAR, ARAF, ARF5, ARRB2, ATF1, BCL6, BTRC, CCND1, CDKN1A, COLIA2, CSF1R, CUL1, CUL3, EIF2AK2, EIF4E, EIF4G1, EIF4G2, ERBB3, FAN1, FGFR1, FGFR3, FLNA, FLNB, FN1, GBP5, GBP6, GRIN1, HIF1A, HLA-A, HLA-C, HLA-DPB1, HLA-E, HNRPD, HSP90AA1, HSP90B1, IFITM1, IL10RA, IL16, IL2RB, IQGAP1, IRAK1, IRF4, ISG15, KPNA2, LAT, LCP1, LGAL59, MAP3K11, MAP3K14, MAPK2, MSN, MUP107, NUP210, NUP62, PEBP1, PIK3CD, PIM1, PRKACA, PSMA1, PSMA2, PSMB1, PSMB8, PSMC2, PSMC4, PSMD10, PSMD13, PTK2B, PTPN7, RAPGEF1, RASA3, RASAL13, S100A9, SEC13, SMARCA4, SP140L, SPTAN1, SPTBN1, STAT3, STAT4, STAT5A, STAT6, STX1A, TALDO1, TNFRSF1B, TNFRSF4, TRIM22, TRIM8, TYK2, UBA7, UBC, UBE2M, UBE2N, VAV1, VCL, ZEB1 | 479/1092 | 2005 |
| <a href="#">GTP hydrolysis and joining of the 60S ribosomal subunit</a>           | 31/120    | $6.25 \times 10^{-6}$ | $6.25 \times 10^{-6}$ | 3/3     | EIF3H1, EIF3M, EIF4B, EIF4E, EIF4G1, EIF4H, RPL10A, RPL12, RPL15, RPL17, RPL22, RPL24, RPL26, RPL27, RPL27A, RPL4, RPL41, RPL7, RPS10, RPS18, RPS19, RPS25, RPS4Y2, RPS5, RRP1, TGM2                                                                                                                                                                                                                                                                                                                                                                                                                                                                                                                   | 75/120   | 96   |
| <a href="#">L13a-mediated translational silencing of Ceruloplasmin expression</a> | 31/120    | $6.25 \times 10^{-6}$ | $6.25 \times 10^{-6}$ | 2/3     | EIF3A, EIF3B, EIF3G, EIF3H, EIF3M, EIF4B, EIF4E, EIF4G1, EIF4H, RPL10A, RPL12, RPL15, RPL17, RPL22, RPL24, RPL26, RPL27, RPL27A, RPL4, RPL41, RPL7, RPS10, RPS18, RPS19, RPS25, RPS4Y2, RPS5, RRP1, TGM2                                                                                                                                                                                                                                                                                                                                                                                                                                                                                               | 75/120   | 95   |
| <a href="#">Cap-dependet Translation Initiation</a>                               | 32/130    | $9.29 \times 10^{-6}$ | $9.29 \times 10^{-6}$ | 16/18   | EIF2B4, EIF3A, EIF3B, EIF3G, EIF3H, EIF3M, EIF4B, EIF4E, EIF4G1, EIF4H, RPL10A, RPL12, RPL15, RPL17, RPL22,                                                                                                                                                                                                                                                                                                                                                                                                                                                                                                                                                                                            | 79/130   | 147  |

|                                                                               |        |                       |                       |       |                                                                                                                                                                                                                                                                     |         |      |
|-------------------------------------------------------------------------------|--------|-----------------------|-----------------------|-------|---------------------------------------------------------------------------------------------------------------------------------------------------------------------------------------------------------------------------------------------------------------------|---------|------|
|                                                                               |        |                       |                       |       | RPL24, RPL26, RPL27, RPL27A, RPL4, RPL41, RPL7, RPS10, RPS18, RPS19, RPS25, RPS4Y2, RPS5, RRP1, TGM2                                                                                                                                                                |         |      |
| <a href="#">Eukaryotic Translation Initiation</a>                             | 32/130 | $9.29 \times 10^{-6}$ | $9.29 \times 10^{-6}$ | 18/21 | EIF2B4, EIF3A, EIF3B, EIF3G, EIF3H, EIF3M, EIF4B, EIF4E, EIF4G1, EIF4H, RPL10A, RPL12, RPL15, RPL17, RPL22, RPL24, RPL26, RPL27, RPL27A, RPL4, RPL41, RPL7, RPS10, RPS18, RPS19, RPS25, RPS4Y2, RPS5, RRP1, TGM2                                                    | 79/130  | 146  |
| <a href="#">Class I MHC mediated antigen processing &amp; presentation</a>    | 72/465 | $3.04 \times 10^{-7}$ | $3.66 \times 10^{-5}$ | 30/48 | BIRC6, BTRC, CUL1, CUL3, FBXL19, FBXO21, FBXW5, HLA-A, HLA-C, HLA-E, KCTD7, KEAP1, MAL, NARF, NCF2, PSMA1, PSMA2, PSMB1, PSMB8, PSMC2, PSMC4, PSMD10, PSMD13, RNF19A, RNF213, SEC13, SIAH2, STUB1, TRIM41, UBA1, UBA7, UBC, UBE2J2, UBE2M, UBE2N, UBR4, WWP1, ZNRF1 | 240/473 | 1377 |
| <a href="#">Formation of a pool of free 40S subunits</a>                      | 27/106 | $3.84 \times 10^{-7}$ | $4.26 \times 10^{-5}$ | 2/2   | EIF3A, EIF3B, EIF3G, EIF3H, EIF3M, RPL10A, RPL12, RPL15, RPL17, RPL22, RPL24, RPL26, RPL27, RPL27A, RPL4, RPL41, RPL7, RPS10, RPS18, RPS19, RPS25, RPS4Y2, RPS5, RRP1, TGM2                                                                                         | 66/106  | 101  |
| <a href="#">Major pathway of rRNA processing in the nucleolus and cytosol</a> | 38/189 | $6.77 \times 10^{-7}$ | $7.04 \times 10^{-5}$ | 7/7   | BYSL, CSNK1E, DDX21, EXOSC10, EXOSC7, GNL3, IMP4, LTV1, NCL, NOC4L, NOL11, PDCCD11, RIOK3, RPL10A, RPL12, RPL15, RPL17, RPL22, RPL24, RPL26, RPL27, RPL27A, RPL4, RPL41, RPL7, RPS10, RPS18, RPS19, RPS25, RPS4Y2, RPS5, RRP1, SKIV2L2, UTP6, WDR18                 | 109/189 | 334  |

|                                                                  |         |                  |                  |        |                                                                                                                                                                                                                                                                                                                                                                                                                                                                                                                                                                                                                                                                                                               |         |      |
|------------------------------------------------------------------|---------|------------------|------------------|--------|---------------------------------------------------------------------------------------------------------------------------------------------------------------------------------------------------------------------------------------------------------------------------------------------------------------------------------------------------------------------------------------------------------------------------------------------------------------------------------------------------------------------------------------------------------------------------------------------------------------------------------------------------------------------------------------------------------------|---------|------|
| <a href="#">Metabolism of RNA</a>                                | 102/782 | $3.01 * 10^{-6}$ | $2.92 * 10^{-4}$ | 92/187 | ADAR, BYSL, C22orf28, C2orf9, CNOT1, CSNK1E, CSTF2T, DDX1, DDX21, DDX39A, EDC4, EFTUD2, EIF4B, EIF4E, EIF4C1, ELAVL1, ERCC3, EXOSC10, EXOSC7, GNL3, FTF2F1, HNRNPA0, HNRNPC, HNRNPD, HNRNPM, HNRNPR, IMP4, LTV1, NCL, NOC4L, NOL11, NT5C3L, NUP107, NUP210, NUP62, PDCD11, POLR2L, PRKACA, PRKCA, PRPF31, PRPF6, PSMA1, PSMA2, PSMB1, PSMB8, PSMC2, PSMC4, PSMD10, PSMD13, PTBP1, PUF60, PUS3, RIOK3, RPL10A, RPL12, RPL15, RPL17, RPL22, RPL24, RPL26, RPL27, RPL27A, RPL4, RPL41, RPL7, RPS10, RPS18, RPS19, RPS25, RPS4Y2, RPS6, RRP1, SEC13, SF1, SF3B4, SKIV2L, SKIV2L2, SLU7, SMG5, SMG7, SMG8, SRRM2, SRSF2, SRSF3, SRSF5, SRSF7, SUPT5H, THOC2, TNKS1BP1, TSEN54, U2AF2, UBC, UPF1, UTP6, WDR19, XPOT | 387/782 | 1712 |
| <a href="#">rRNA processing in the nucleus and cytosol</a>       | 38/207  | $5.42 * 10^{-6}$ | $4.98 * 10^{-4}$ | 8/15   | BYSL, CSNK1E, DDX21, EXOSC10, EXOSC7, GNL3, IMP4, LTV1, NCL, NOC4L, NOL11, PDCD11, RIOK3, RPL10A, RPL12, RPL15, RPL17, RPL22, RPL24, RPL26, RPL27, RPL27A, RPL4, RPL41, RPL7, RPS10, RPS18, RPS19, RPS25, RPS4Y2, RPS5, RRP1, SKIV2L2, UPT6, WDR18                                                                                                                                                                                                                                                                                                                                                                                                                                                            | 113/207 | 579  |
| <a href="#">Eukaryotic Translation Elongation</a>                | 24/102  | $6.20 * 10^{-6}$ | $5.33 * 10^{-4}$ | 8/9    | EEF1A1, EEF1D, EEF1G, RPL10A, RPL12, RPL15, RPL17, RPL22, RPL24, RPL26, RPL27, RPL27A, RPL4, RPL41, RPL7, RPS10, RPS18, RPS19, RPS25, RPS4Y2, RPS5, RRP1                                                                                                                                                                                                                                                                                                                                                                                                                                                                                                                                                      | 60/102  | 212  |
| <a href="#">Nonsense Mediated Decay (NMD) independent of the</a> | 23/101  | $1.59 * 10^{-5}$ | 0.001            | 1/1    | EIF4G1, RPL10A, RPL12, RPL15, RPL17, RPL22, RPL24, RPL26, RPL27, RPL27A,                                                                                                                                                                                                                                                                                                                                                                                                                                                                                                                                                                                                                                      | 62/101  | 126  |

|                                                                                           |        |                       |       |       |                                                                                                                                                                                                                                                                                                                                                              |         |      |
|-------------------------------------------------------------------------------------------|--------|-----------------------|-------|-------|--------------------------------------------------------------------------------------------------------------------------------------------------------------------------------------------------------------------------------------------------------------------------------------------------------------------------------------------------------------|---------|------|
| <a href="#">Exon Junction Complex (EJC)</a>                                               |        |                       |       |       | RPL4, RPL41, RPL7, RPS10, RPS18, RPS19, RPS25, RPS4Y2, RPS5, RRP1, UPF1                                                                                                                                                                                                                                                                                      |         |      |
| <a href="#">Translation</a>                                                               | 52/339 | $1.71 \times 10^{-5}$ | 0.001 | 65/99 | AARS2, APEH, AURKA1P1, CCDC142, DDOST, EEF1A1, EEF1D, EEF1G, EIF2B4, EIF3A, EIF3B, EIF3G, EIF3H, EIF3M, EIF4B, EIF4E, EIF4G1, EIF4H, FARSA, HARS, LARS, MRPL4, MRPL54, MRPS6, OXA1L, PARS2, PPA1, RPL10A, RPL12, RPL15, RPL17, RPL22, RPL24, RPL26, RPL27, RPL27A, RPL4, RPL41, RPL7, RPS10, RPS18, RPS19, RPS25, RPS4Y2, RPS5, RRP1, SARS, TGM2, VARS, YARS | 149/339 | 1710 |
| <a href="#">Nonsense-Mediated Decay (NMD)</a>                                             | 26/124 | $1.86 \times 10^{-5}$ | 0.001 | 6/6   | EIF4G1, RPL10A, RPL12, RPL15, RPL17, RPL22, RPL24, RPL26, RPL27, RPL27A, RPL4, RPL41, RPL7, RPS10, RPS18, RPS19, RPS25, RPS4Y2, RPS5, RRP1, UPF1                                                                                                                                                                                                             | 72/124  | 273  |
| <a href="#">Nonsense Mediated Decay (NMD) enhanced by the Exon Junction Complex (EJC)</a> | 26/124 | $1.86 \times 10^{-5}$ | 0.001 | 5/5   | EIF4G1, RPL10A, RPL12, RPL15, RPL17, RPL22, RPL24, RPL26, RPL27, RPL27A, RPL4, RPL41, RPL7, RPS10, RPS18, RPS19, RPS25, RPS4Y2, RPS5, RRP1, SMG5, SMG7, SMG8, UPF1                                                                                                                                                                                           | 72/124  | 274  |
| <a href="#">Translation initiation complex formation</a>                                  | 17/62  | $2.11 \times 10^{-5}$ | 0.001 | 2/2   | EIF3A, EIF3B, EIF3G, EIF3H, EIF3M, EIF4B, EIF4E, EIF4G1, EIF4H, RPS10, RPS18, RPS19, RPS25, RPS4Y2, RPS5, TGM2                                                                                                                                                                                                                                               | 37/62   | 184  |
| <a href="#">Peptide chain elongation</a>                                                  | 22/97  | $2.55 \times 10^{-5}$ | 0.002 | 4/5   | EEF1A1, RPL10A, RPL12, RPL15, RPL17, RPL22, RPL24, RPL26, RPL27, RPL27A, RPL4, RPL41, RPL7, RPS10, RPS18, RPS19, RPS25, RPS4Y2, RPS5, RRP1                                                                                                                                                                                                                   | 57/97   | 213  |
| <a href="#">Ribosomal scanning and start codon recognition</a>                            | 17/64  | $3.12 \times 10^{-5}$ | 0.002 | 2/2   | EIF3A, EIF3B, EIF3G, EIF3H, EIF3M, EIF4B, EIF4E, EIF4G1, EIF4H, RPS10, RPS18, RPS19, RPS25, RPS4Y2, RPS5, TGM2                                                                                                                                                                                                                                               | 36/64   | 296  |
