# Supplementary material for: Functional Analysis of Autoantibody Signatures in Rheumatoid Arthritis
Source: MDPI journal article supplement (doi:10.3390/molecules27041452), 2022-02-21
Supplement: s1 [file s1]

## Supplementary Table S1

Supplementary Table S1: Top 25 enriched pathways identified for DIRAGs higher reactive in seropositive versus seronegative RA in human IgG profiling. Out of 206 clean genesymbols, 101 were found Reactome pathway browser. Name of the pathway (link to Reactome pathway browser), found and total entities, their respective p-value and FDR and found and total reactions are given. The genesymbol found in Reactome and the overrepresentation analysis of the complete 16k chip serving as reference for the respective pathway is given (continued on page 2).

| Pathway name                                                                                     | found/total entities | entities p-value  | entities FDR (BH) | found/total reactions | GeneSymbols found                | found/total entities (16k) | rank (16k) |
|--------------------------------------------------------------------------------------------------|----------------------|-------------------|-------------------|-----------------------|----------------------------------|----------------------------|------------|
| <a href="#">Endosomal/vacuolar pathway</a>                                                       | 14/82                | $3.18 * 10^{-10}$ | $1.99 * 10^{-7}$  | 3/4                   | HLA-C                            | 74/82                      | 1          |
| <a href="#">Antigen Presentation: Folding, assembly and peptide loading of class I MHC</a>       | 14/102               | $4.98 * 10^{-9}$  | $1.56 * 10^{-6}$  | 13/16                 | HLA-C                            | 84/102                     | 2          |
| <a href="#">Interferon alpha/beta signaling</a>                                                  | 17/184               | $3.64 * 10^{-8}$  | $6.95 * 10^{-6}$  | 2/20                  | HLA-C, IRF5                      | 120/186                    | 41         |
| <a href="#">ER-Phagosome pathway</a>                                                             | 16/164               | $4.45 * 10^{-8}$  | $6.95 * 10^{-6}$  | 4/10                  | HLA-C, PSMB11, PSMD14            | 122/173                    | 3          |
| <a href="#">Interferon gamma signaling</a>                                                       | 19/250               | $1.16 * 10^{-7}$  | $1.45 * 10^{-5}$  | 2/15                  | GBP6, HLA-C, IRF5                | 138/250                    | 572        |
| <a href="#">Antigen processing-Cross presentation</a>                                            | 16/186               | $2.38 * 10^{-7}$  | $2.48 * 10^{-5}$  | 8/23                  | HLA-C, PSMB11, PSMD14            | 127/195                    | 22         |
| <a href="#">Interferon Signaling</a>                                                             | 21/392               | $6.44 * 10^{-6}$  | $5.74 * 10^{-4}$  | 6/66                  | EIF4G2, GBP6, HLA-C, IRF5, KPNA3 | 205/394                    | 1102       |
| <a href="#">Carboxyterminal post-translational modifications of tubulin</a>                      | 7/52                 | $4.17 * 10^{-5}$  | 0.003             | 6/6                   | TUBA1B, TUBB2B                   | 15/55                      | 1589       |
| <a href="#">RHO GTPases activate IQGAPs</a>                                                      | 6/36                 | $4.65 * 10^{-5}$  | 0.003             | 5/5                   | IQGAP2, TUBA1B, TUBB2B           | 17/36                      | 577        |
| <a href="#">Microtubule-dependent trafficking of connexons from Golgi to the plasma membrane</a> | 5/22                 | $4.79 * 10^{-5}$  | 0.003             | 1/2                   | TUBA1B, TUBB2B                   | 9/22                       | 693        |
| <a href="#">Transport of connexons to the plasma membrane</a>                                    | 5/23                 | $5.89 * 10^{-5}$  | 0.003             | 1/3                   | TUBA1B, TUBB2B                   | 9/23                       | 761        |
| <a href="#">Recycling pathway of L1</a>                                                          | 6/55                 | $4.50 * 10^{-4}$  | 0.023             | 6/14                  | MSN, TUBA1B, TUBB2B              | 30/55                      | 368        |

|                                                                                          |         |                       |       |        |                                                                                     |          |      |
|------------------------------------------------------------------------------------------|---------|-----------------------|-------|--------|-------------------------------------------------------------------------------------|----------|------|
| <a href="#">The role GTSE1 in G2/M progression after G2 checkpoint</a>                   | 7/83    | $7.00 \times 10^{-4}$ | 0.034 | 4/10   | PSMB11, PSMD14, TUBA1B, TUBB2B                                                      | 53/83    | 87   |
| <a href="#">Gap junction assembly</a>                                                    | 5/41    | $8.24 \times 10^{-4}$ | 0.036 | 3/16   | TUBA1B, TUBB2B                                                                      | 11/41    | 1485 |
| <a href="#">Post-chaperonin tubulin folding pathway</a>                                  | 4/25    | 0.001                 | 0.042 | 9/9    | TUBA1B, TUBB2B                                                                      | 11/25    | 610  |
| <a href="#">Immunoregulatory interactions between a lymphoid and a non-lymphoid cell</a> | 14/316  | 0.001                 | 0.056 | 7/43   | HLA-C                                                                               | 95/316   | 2008 |
| <a href="#">HSP90 chaperone cycle for steroid hormone receptors (SHR)</a>                | 6/70    | 0.002                 | 0.056 | 4/12   | FKBP5, TUBA1B, TUBB2B                                                               | 27/72    | 1322 |
| <a href="#">Formation of tubulin folding intermediates by CCT/TriC</a>                   | 4/30    | 0.002                 | 0.068 | 2/2    | TUBA1B, TUBB2B                                                                      | 17/30    | 250  |
| <a href="#">Gap junction trafficking</a>                                                 | 5/52    | 0.002                 | 0.073 | 3/20   | TUBA1B, TUBB2B                                                                      | 18/52    | 1291 |
| <a href="#">Separation of Sister Chromatids</a>                                          | 10/194  | 0.002                 | 0.073 | 5/8    | ANAPC3, CDCA5, PPP2R1A, PSMB11, PSMD14, TUBA1B, TUBB2B                              | 100/195  | 877  |
| <a href="#">Cytokine signaling in Immune system</a>                                      | 31/1055 | 0.003                 | 0.087 | 23/639 | EIF4G2, GBP6, HLA-C, HNRPDL, IL17, IRF5, KPNA3, MSN, NFKB2, PPP2R1A, PSMB11, PSMD14 | 479/1092 | 2005 |
| <a href="#">Gap junction trafficking and regulation</a>                                  | 5/56    | 0.003                 | 0.089 | 3/24   | TUBA1B, TUBB2B                                                                      | 19/56    | 1366 |
| <a href="#">Class I MHC mediated antigen processing and presentation</a>                 | 17/464  | 0.003                 | 0.092 | 26/48  | ANAPC3, HLA-C, PSMB11, PSMD14                                                       | 240/473  | 1377 |
| <a href="#">Mitotic Anaphase</a>                                                         | 10/208  | 0.004                 | 0.1   | 6/11   | ANAPC3, CDCA5, PPP2R1A, PSMB11, PSMD14, TUBA1B, TUBB2B                              | 124/249  | 1106 |
| <a href="#">Cooperation of Prefolding and TriC/CCT in actin and tubulin folding</a>      | 4/37    | 0.004                 | 0.101 | 4/6    | TUBA1B, TUBB2B                                                                      | 22/37    | 185  |
