# Supplementary material for: Functional Analysis of Autoantibody Signatures in Rheumatoid Arthritis
Source: MDPI journal article supplement (doi:10.3390/molecules27041452), 2022-02-21
Supplement: s1 [file s1]

## Supplementary Table S4

**Supplementary Table S4:** The enriched pathways for antigens **positively (A)** and the **top 20 negatively (B)** correlated with CDAI. Out of the 429 antigenic proteins found significantly correlated with CDAI of both seropositive and seronegative RA patients, 153 positively correlated and 276 negatively correlated proteins were subjected separately to Reactome pathway analysis. Names (linked to Reactome pathway browser), found and total entities, ratio, their p-value and FDRs are given, the number of found & total reactions, as well the respective ratio are given.

| A) POSITIVELY CORRELATED                                                   | Entities  | Entities | Entities | Entities | Entities | Reactions | Reactions | Reactions |
|----------------------------------------------------------------------------|-----------|----------|----------|----------|----------|-----------|-----------|-----------|
| Pathway name                                                               | found     | Total    | ratio    | pValue   | FDR      | found     | total     | ratio     |
| RNA Polymerase I Transcription Initiation                                  | <u>4</u>  | 50       | 0.003    | 2.86E-03 | 3.37E-01 | 4         | 6         | 0         |
| RUNX1 regulates expression of components of tight junctions                | <u>2</u>  | 8        | 0.001    | 3.99E-03 | 3.37E-01 | 2         | 6         | 0         |
| Metabolism of RNA                                                          | <u>18</u> | 785      | 0.052    | 4.49E-03 | 3.37E-01 | 70        | 187       | 0.014     |
| Epigenetic regulation of gene expression                                   | <u>6</u>  | 139      | 0.009    | 5.85E-03 | 3.37E-01 | 6         | 34        | 0.002     |
| Cyclin A/B1/B2 associated events during G2/M transition                    | <u>3</u>  | 32       | 0.002    | 6.31E-03 | 3.37E-01 | 3         | 25        | 0.002     |
| RNA Polymerase I Transcription Termination                                 | <u>3</u>  | 33       | 0.002    | 6.86E-03 | 3.37E-01 | 3         | 4         | 0         |
| Nef mediated downregulation of MHC class I complex cell surface expression | <u>2</u>  | 11       | 0.001    | 7.38E-03 | 3.37E-01 | 3         | 4         | 0         |
| Formation of the HIV-1 Early Elongation Complex                            | <u>3</u>  | 34       | 0.002    | 7.44E-03 | 3.37E-01 | 5         | 5         | 0         |
| Formation of the Early Elongation Complex                                  | <u>3</u>  | 34       | 0.002    | 7.44E-03 | 3.37E-01 | 3         | 3         | 0         |
| mRNA Capping                                                               | <u>3</u>  | 35       | 0.002    | 8.05E-03 | 3.37E-01 | 11        | 11        | 0.001     |
| Glycolysis                                                                 | <u>5</u>  | 110      | 0.007    | 9.42E-03 | 3.37E-01 | 3         | 24        | 0.002     |
| Activation of PPARGC1A (PGC-1alpha) by phosphorylation                     | 2         | 13       | 0.001    | 1.02E-02 | 3.37E-01 | 2         | 2         | 0         |

| <b>B) NEGATIVELY CORRELATED</b>                                            | <b>Entities</b> | <b>Entities</b> | <b>Entities</b> | <b>Entities</b> | <b>Entities</b> | <b>Reactions</b> | <b>Reactions</b> | <b>Reactions</b> |
|----------------------------------------------------------------------------|-----------------|-----------------|-----------------|-----------------|-----------------|------------------|------------------|------------------|
| <b>Pathway name</b>                                                        | <b>found</b>    | <b>Total</b>    | <b>ratio</b>    | <b>pValue</b>   | <b>FDR</b>      | <b>found</b>     | <b>total</b>     | <b>ratio</b>     |
| Antigen Presentation: Folding, assembly and peptide loading of class I MHC | <u>37</u>       | 103             | 0.007           | 1.11E-16        | 1.57E-14        | 13               | 16               | 0.001            |
| Endosomal/Vacuolar pathway                                                 | <u>36</u>       | 82              | 0.005           | 1.11E-16        | 1.57E-14        | 3                | 4                | 0                |
| Class I MHC mediated antigen processing & presentation                     | <u>51</u>       | 474             | 0.031           | 1.11E-16        | 1.57E-14        | 28               | 48               | 0.004            |
| ER-Phagosome pathway                                                       | <u>44</u>       | 173             | 0.011           | 1.11E-16        | 1.57E-14        | 4                | 10               | 0.001            |
| Interferon Signaling                                                       | <u>50</u>       | 394             | 0.026           | 1.11E-16        | 1.57E-14        | 25               | 71               | 0.005            |
| Antigen processing-Cross presentation                                      | <u>44</u>       | 195             | 0.013           | 1.11E-16        | 1.57E-14        | 8                | 23               | 0.002            |
| Interferon alpha/beta signaling                                            | <u>45</u>       | 188             | 0.012           | 1.11E-16        | 1.57E-14        | 6                | 24               | 0.002            |
| Interferon gamma signaling                                                 | <u>43</u>       | 250             | 0.017           | 1.11E-16        | 1.57E-14        | 2                | 16               | 0.001            |
| Immunoregulatory interactions between a Lymphoid and a non-Lymphoid cell   | <u>37</u>       | 316             | 0.021           | 2.11E-15        | 2.64E-13        | 10               | 44               | 0.003            |
| Cytokine Signaling in Immune system                                        | <u>70</u>       | 1,092           | 0.072           | 1.37E-14        | 1.54E-12        | 67               | 710              | 0.052            |
| Adaptive Immune System                                                     | <u>59</u>       | 1,005           | 0.067           | 7.67E-11        | 7.83E-09        | 82               | 264              | 0.019            |
| Immune System                                                              | <u>99</u>       | 2,684           | 0.178           | 1.26E-06        | 1.19E-04        | 238              | 1,625            | 0.119            |
| AUF1 (hnRNP D0) binds and destabilizes mRNA                                | <u>8</u>        | 56              | 0.004           | 6.34E-05        | 5.51E-03        | 3                | 4                | 0                |
| Regulation of mRNA stability by proteins that bind AU-rich elements        | <u>10</u>       | 93              | 0.006           | 8.41E-05        | 6.73E-03        | 12               | 26               | 0.002            |
| ROS sensing by NFE2L2                                                      | <u>8</u>        | 60              | 0.004           | 1.02E-04        | 7.62E-03        | 3                | 8                | 0.001            |

|                                                                     |           |     |       |          |          |    |     |       |
|---------------------------------------------------------------------|-----------|-----|-------|----------|----------|----|-----|-------|
| HIV Infection                                                       | <u>17</u> | 263 | 0.017 | 1.94E-04 | 1.26E-02 | 35 | 160 | 0.012 |
| Regulation of activated PAK-2p34 by proteasome mediated degradation | <u>7</u>  | 50  | 0.003 | 2.05E-04 | 1.26E-02 | 2  | 2   | 0     |
| APC/C:Cdc20 mediated degradation of Securin                         | <u>8</u>  | 68  | 0.005 | 2.36E-04 | 1.26E-02 | 3  | 3   | 0     |
| Vpu mediated degradation of CD4                                     | <u>7</u>  | 53  | 0.004 | 2.90E-04 | 1.26E-02 | 2  | 5   | 0     |
| p53-Independent G1/S DNA damage checkpoint                          | <u>7</u>  | 54  | 0.004 | 3.24E-04 | 1.26E-02 | 2  | 4   | 0     |
