# Supplementary material for: Functional Analysis of Autoantibody Signatures in Rheumatoid Arthritis
Source: MDPI journal article supplement (doi:10.3390/molecules27041452), 2022-02-21
Supplement: s1 [file s1]

Supplementary Figure S2: Boxplots of top 10 DIRAGs in human RA and the PIA rat model

top10 DIRAGs higher reactive in seropositive RA

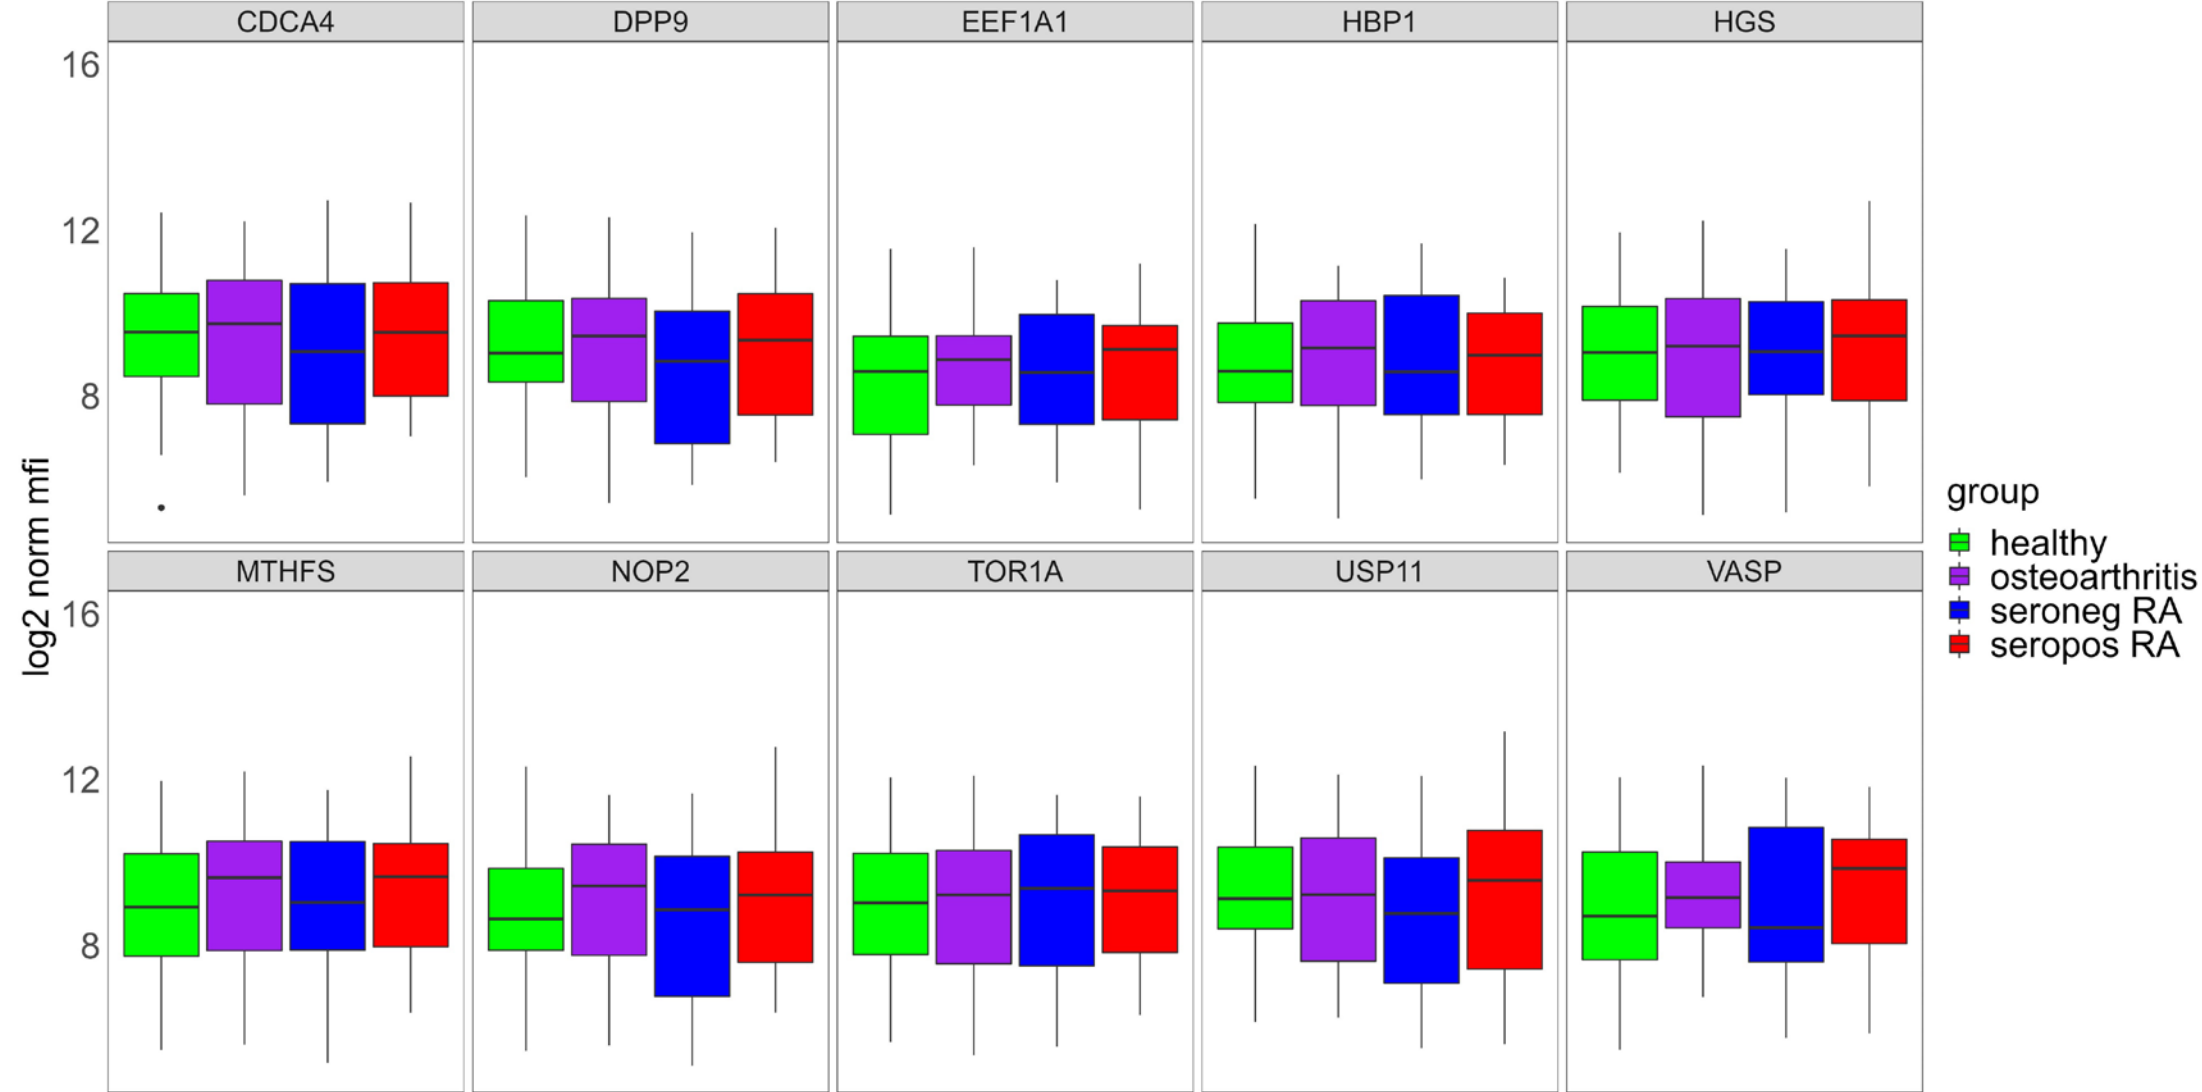

**Supplementary Figure S2:** signal intensities of the top10 DIRAGs significantly higher reactive in seropositive RA versus seronegative RA (sorted by p-value and fold-change). Each panel shows the groupwise intensities for healthy (green), osteoarthritis (purple), seronegative RA (blue) and seropositive RA (red).

top10 DIRAGs higher reactive in seronegative RA

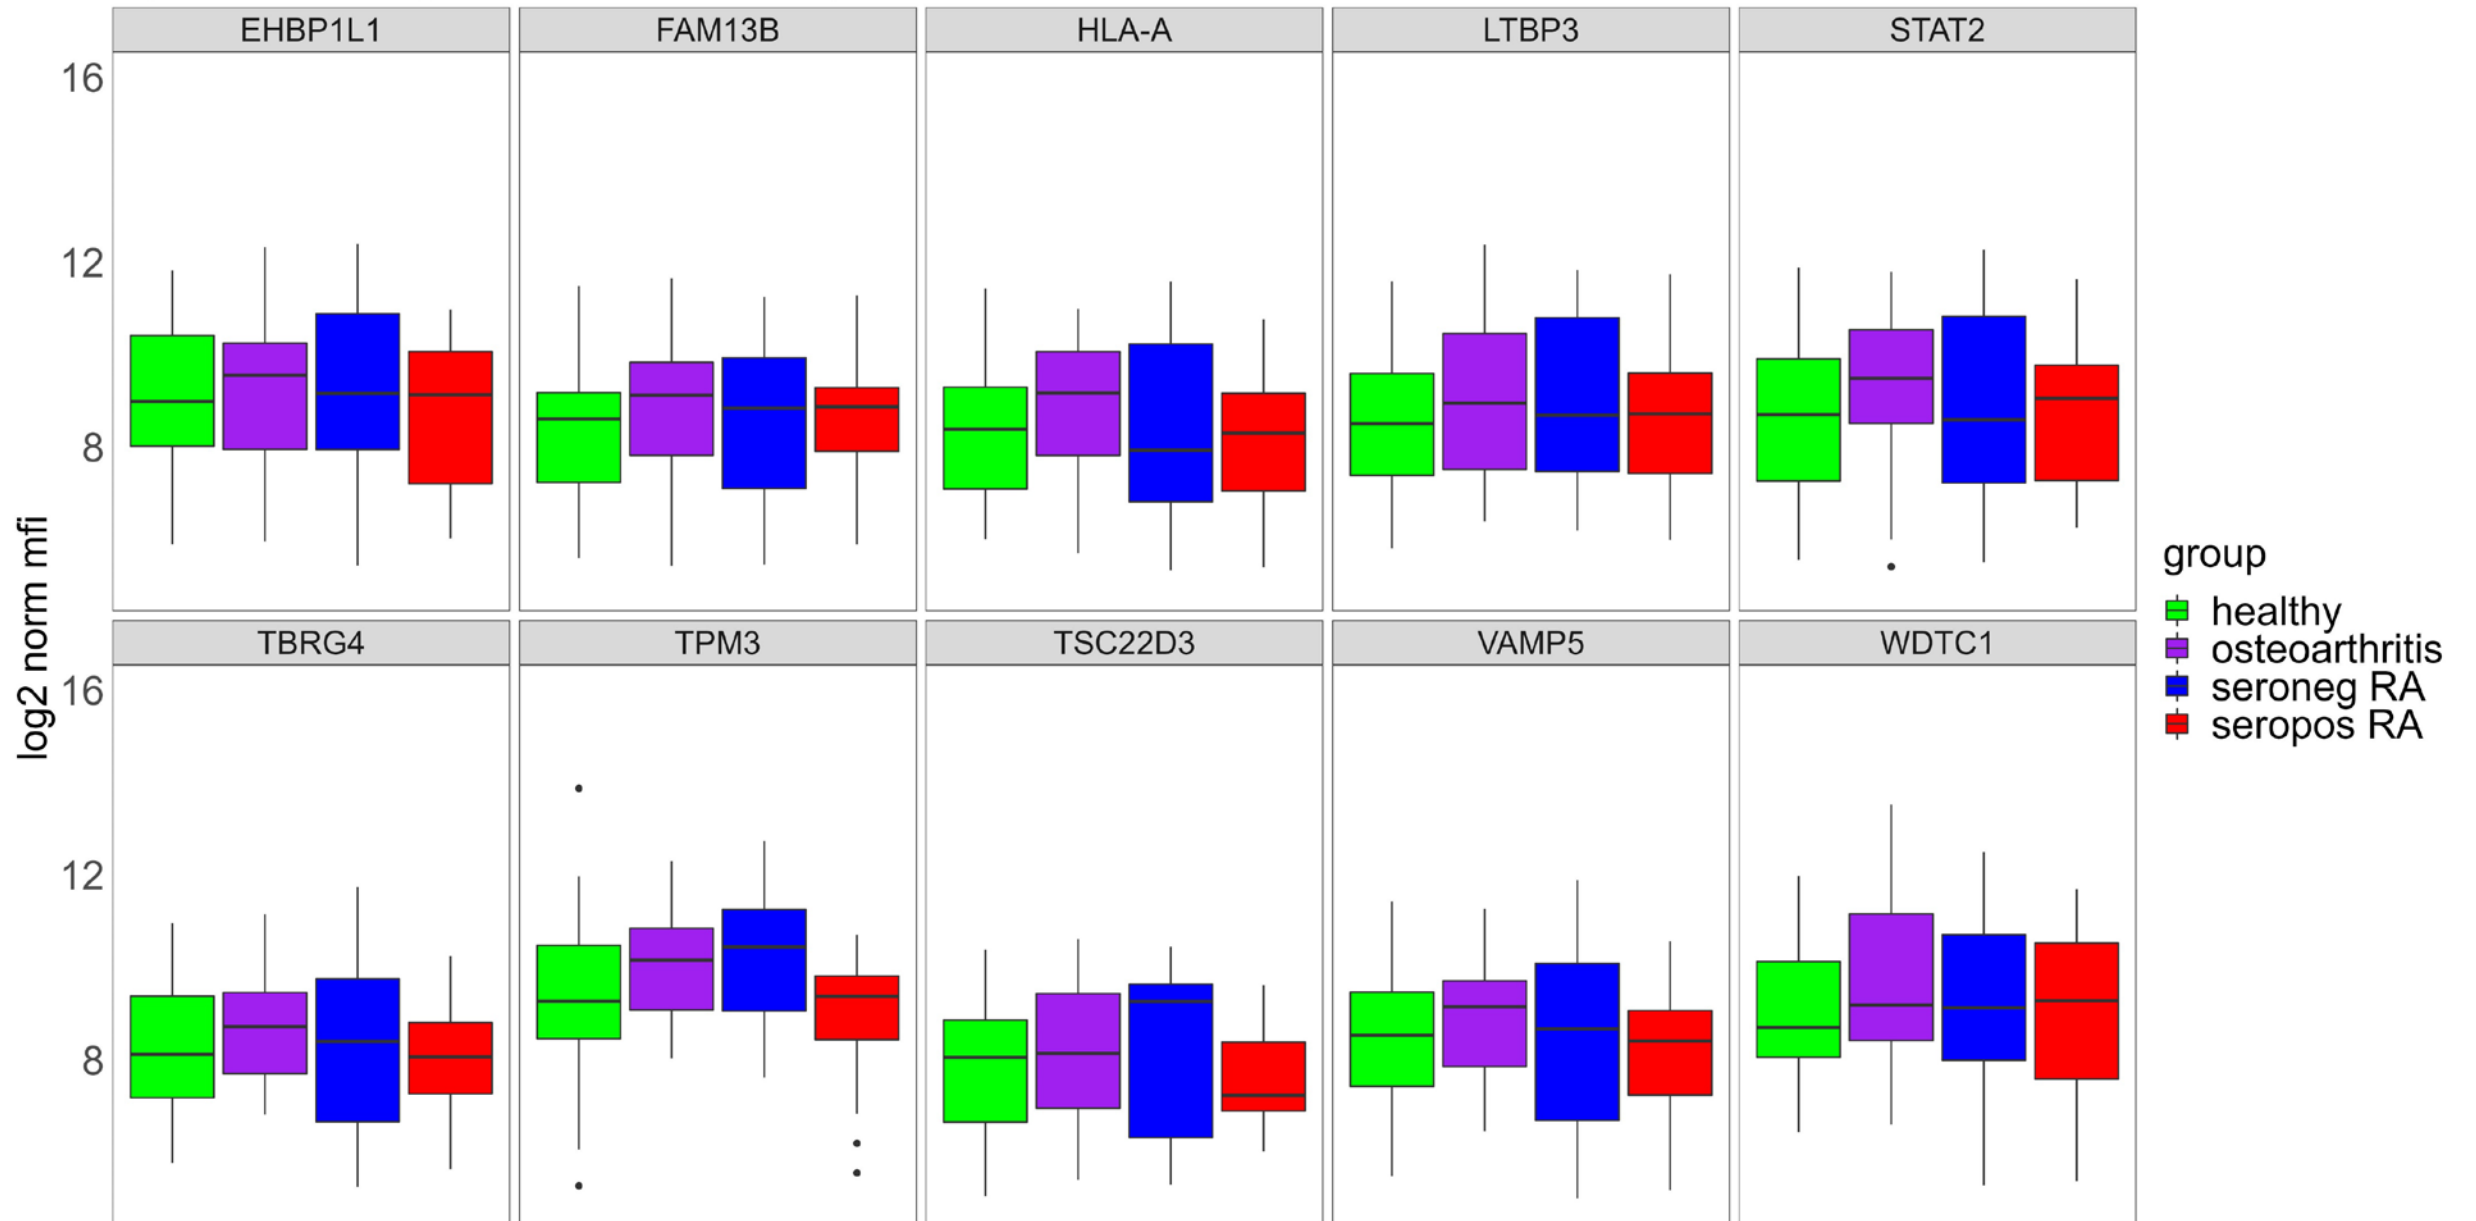

**Supplementary figure 2:** signal intensities of the top10 DIRAGs significantly higher reactive in seronegative RA versus seropositive RA (sorted by p-value and fold-change). Each panel shows the groupwise intensities for healthy (green), osteoarthritis (purple), seronegative RA (blue) and seropositive RA (red).

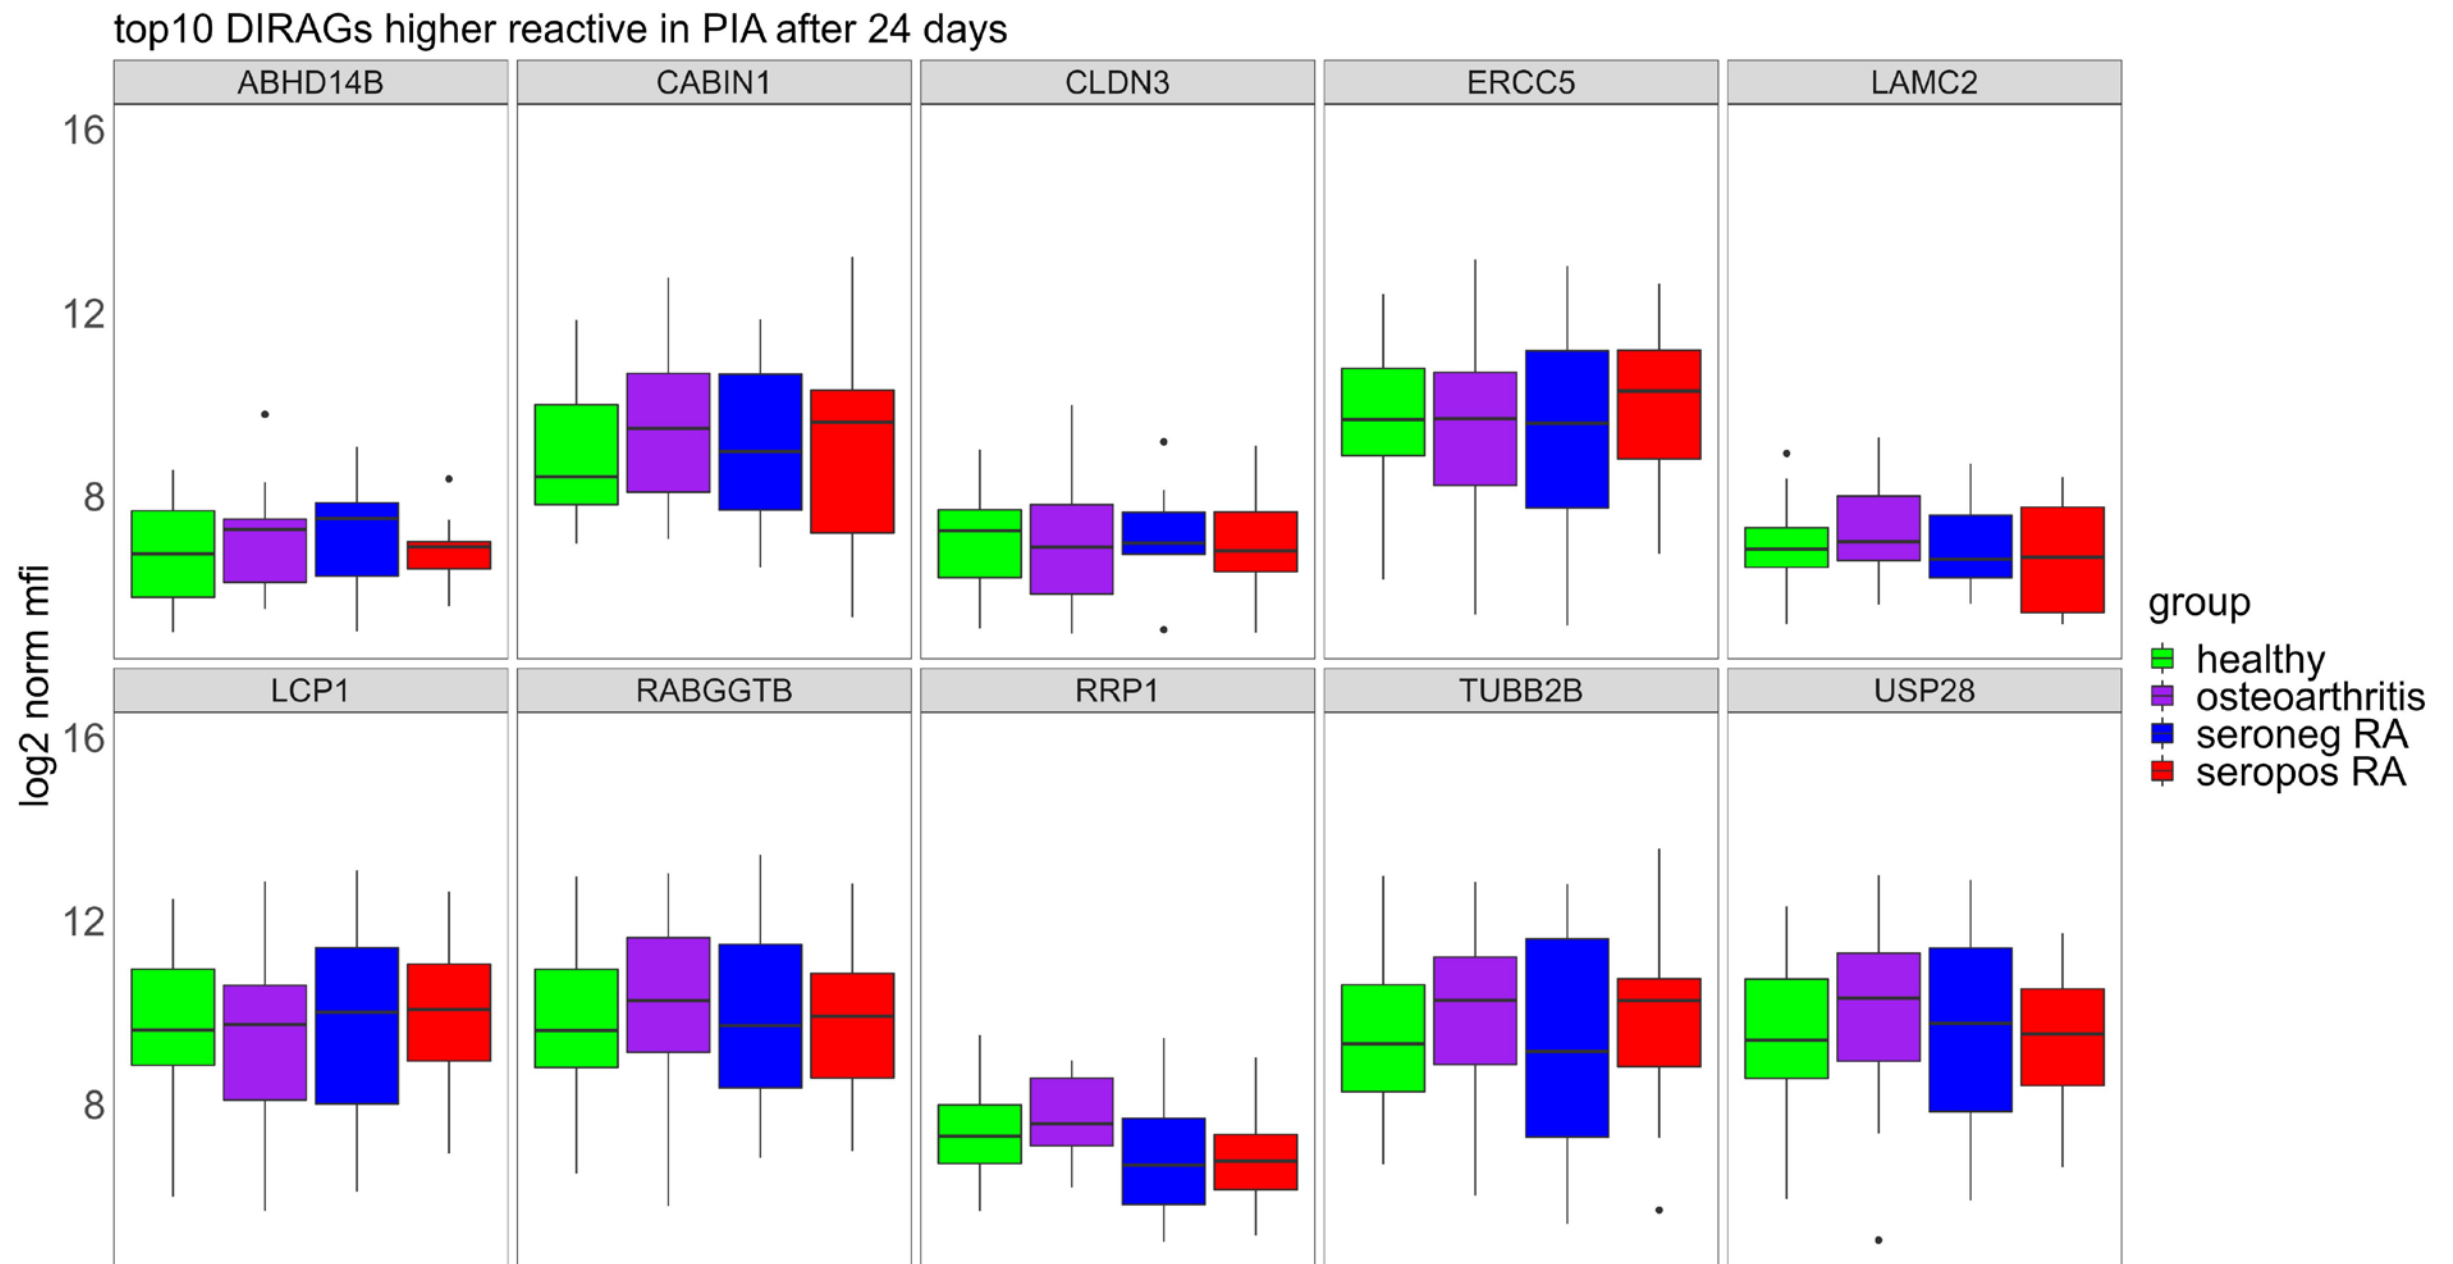

**Supplementary figure 3:** signal intensities of the top10 DIRAGs significantly higher reactive in PIA animals within the disease onset period (corrected for control animals, sorted by p-value and fold-change). Each panel shows the groupwise intensities for healthy (green), osteoarthritis (purple), seronegative RA (blue) and seropositive RA (red).
