# Supplementary material for: Functional Analysis of Autoantibody Signatures in Rheumatoid Arthritis
Source: MDPI journal article supplement (doi:10.3390/molecules27041452), 2022-02-21
Supplement: s1 [file s1]

## Supplementary Table S2

Supplementary Table S2: Top 25 pathways enriched pathways for DIRAGs higher reactive in seronegative RA. Out of 221 cleaned IDs, 147 were found in Reactome pathway browser. Names (linked to Reactome pathway browser), found of total entities, their p-value and FDRs are given, the number of found out of total reactions, the found genesymbols within the pathway and results of the overrepresentation analysis for the complete chip are given (continued page 4-5).

| Pathway name                                                                               | found/total entities | entities p-value  | entities FDR (BH) | found/total reactions | GeneSymbols found                                                                         | found/total entities (16k) | rank (16k) |
|--------------------------------------------------------------------------------------------|----------------------|-------------------|-------------------|-----------------------|-------------------------------------------------------------------------------------------|----------------------------|------------|
| <a href="#">Antigen Presentation: Folding, assembly and peptide loading of class I MHC</a> | 36/102               | $1.11 * 10^{-16}$ | $1.31 * 10^{-14}$ | 14/16                 | HLA-A, HLA-C, SEC24C                                                                      | 84/102                     | 2          |
| <a href="#">Endosomal/Vacuolar pathway</a>                                                 | 35/82                | $1.11 * 10^{-16}$ | $1.31 * 10^{-14}$ | 3/4                   | HLA-A, HLA-C                                                                              | 74/82                      | 1          |
| <a href="#">ER-Phagosome pathway</a>                                                       | 37/164               | $1.11 * 10^{-16}$ | $1.31 * 10^{-14}$ | 4/10                  | HLA-A, HLA-C, PSMC3, PSMC5                                                                | 122/173                    | 3          |
| <a href="#">Antigen processing-Cross presentation</a>                                      | 37/186               | $1.11 * 10^{-16}$ | $1.31 * 10^{-14}$ | 8/23                  | HLA-A, HLA-C, PSMC3, PSMC5                                                                | 127/195                    | 22         |
| <a href="#">Immunoregulatory interactions between a Lymphoid and a non-Lymphoid cell</a>   | 38/316               | $1.11 * 10^{-16}$ | $1.31 * 10^{-14}$ | 12/43                 | C3, COL1A2, HLA-A, HLA-C, IGLC1                                                           | 95/316                     | 2008       |
| <a href="#">Interferon gamma signaling</a>                                                 | 37/250               | $1.11 * 10^{-16}$ | $1.31 * 10^{-14}$ | 2/15                  | HLA-A, HLA-C                                                                              | 138/250                    | 572        |
| <a href="#">Interferon alpha/beta signaling</a>                                            | 37/184               | $1.11 * 10^{-16}$ | $1.31 * 10^{-14}$ | 2/20                  | HLA-A, HLA-C                                                                              | 120/186                    | 41         |
| <a href="#">Interferon signaling</a>                                                       | 39/392               | $3.33 * 10^{-16}$ | $3.43 * 10^{-14}$ | 6/66                  | FLNA, HLA-A, HLA-C, NUP62                                                                 | 205/394                    | 1102       |
| <a href="#">Class I MHC mediated antigen processing and presentation</a>                   | 38/464               | $3.40 * 10^{-13}$ | $3.13 * 10^{-11}$ | 23/48                 | HLA-A, HLA-C, PSMC3, PSMC5, SEC24C                                                        | 240/473                    | 1377       |
| <a href="#">Cytokine Signaling in Immune System</a>                                        | 53/1,055             | $6.35 * 10^{-10}$ | $5.21 * 10^{-8}$  | 71/639                | CCND1, COL1A2, FLNA, FN1, HLA-A, HLA-C, IL2RG, IL32, LCK, LCP1, NUP62, PSMC3, PSMC4, SHC1 | 479/1,092                  | 2005       |

|                                                                                                                |          |                         |                         |           |                                                                                                                                                                                                                                                  |           |       |
|----------------------------------------------------------------------------------------------------------------|----------|-------------------------|-------------------------|-----------|--------------------------------------------------------------------------------------------------------------------------------------------------------------------------------------------------------------------------------------------------|-----------|-------|
| <a href="#">Adaptive Immune System</a>                                                                         | 48/997   | 1.78 * 10 <sup>-8</sup> | 1.34 * 10 <sup>-6</sup> | 100/261   | AP2A1, C3, CD74, COL1A2, CTSD, DNM2, DYNC1H1, HLA-A, HLA-C, IGLC1, LCK, MTOR, PSMC3, PSMC5, SEC24C                                                                                                                                               | 393/1,004 | 2031  |
| <a href="#">Transcriptional regulation by RUNX3</a>                                                            | 10/118   | 1.67 * 10 <sup>-4</sup> | 0.012                   | 15/47     | CCND1, CTGF, JAG1, KAT2A, NOTCH1, PSMC3, PSMC5                                                                                                                                                                                                   | 61/118    | 646   |
| <a href="#">Immune system</a>                                                                                  | 77/2,641 | 3.16 * 10 <sup>-4</sup> | 0.02                    | 304/1,493 | ACTB, AP2A1, APEH, APRT, C3, CASP8, CCND1, CCT8, CD74, COL1A2, CTSD, DDOST, DNM2, DSP, DYNC1H1, EEF1A1, FLNA, FN1, GUSB, HLA-A, HLA-C, IGLC1, IL2RG, IL32, IMPDH2, LCK, LCP1, MTOR, MUC5B, MYO1C, NUP62, PSMC3, PSMC5, RNF216, SEC42C, SHC1, VCL | 962/2,681 | 2039  |
| <a href="#">RUNX3 regulates NOTCH signaling</a>                                                                | 4/16     | 3.39 * 10 <sup>-4</sup> | 0.02                    | 7/7       | JAG1, KAT2A, NOTCH1                                                                                                                                                                                                                              | 9/16      | 234   |
| <a href="#">Interleukin-2 signaling</a>                                                                        | 3/14     | 0.003                   | 0.164                   | 11/18     | IL2RG, LCK, SHC1                                                                                                                                                                                                                                 | 7/14      | 374   |
| <a href="#">SHC-related events triggered by IGF1R</a>                                                          | 3/15     | 0.004                   | 0.184                   | 5/5       | SHC1                                                                                                                                                                                                                                             | 4/16      | 1,078 |
| <a href="#">MET activates PTK2 signaling</a>                                                                   | 4/32     | 0.004                   | 0.203                   | 1/5       | COL1A2, FN1, ITGA3, LAMC1                                                                                                                                                                                                                        | 16/32     | 451   |
| <a href="#">Extracellular matrix organization</a>                                                              | 14/329   | 0.007                   | 0.341                   | 103/318   | ADAM19, ADAMTS4, COL1A2, COMP, CTSD, FN1, GLT25D1, HSPG2, ITGA3, LAMC1, LTBP3, PLOD1, SERPINH1                                                                                                                                                   | 118/329   | 1,952 |
| <a href="#">Nef-mediates down modulation of cell surface receptors by recruiting them to clathrin adapters</a> | 3/22     | 0.01                    | 0.419                   | 11/15     | AP2A1, HLA-A, LCK                                                                                                                                                                                                                                | 14/22     | 122   |

|                                                                                   |      |       |       |      |                           |       |     |
|-----------------------------------------------------------------------------------|------|-------|-------|------|---------------------------|-------|-----|
| <a href="#">Constitutive Signaling by NOTCH1 t(7;9) Translocation Mutant</a>      | 2/8  | 0.012 | 0.419 | 5/5  | JAG1, NOTCH1              | 2/8   | 846 |
| <a href="#">Signaling by NOTCH1 t(7;9) Translocation Mutant</a>                   | 2/8  | 0.012 | 0.419 | 5/5  | JAG1, NOTCH1              | 2/8   | 845 |
| <a href="#">RHO GTPases activate CIT</a>                                          | 3/23 | 0.012 | 0.419 | 6/6  | CIT, MYH14                | 13/23 | 244 |
| <a href="#">MET promotes cell motility</a>                                        | 4/45 | 0.014 | 0.419 | 1/12 | COL1A2, FN1, ITGA3, LAMC1 | 21/45 | 647 |
| <a href="#">RUNX3 regulates YAP1-mediated transcription</a>                       | 2/9  | 0.014 | 0.419 | 2/3  | CTGF                      | 4/9   | 414 |
| <a href="#">RUNX1 regulation transcription of genes involved in WNT signaling</a> | 2/9  | 0.014 | 0.419 | 2/4  | AXIN1                     | 3/9   | 648 |
