# Supplementary material for: Functional Analysis of Autoantibody Signatures in Rheumatoid Arthritis
Source: MDPI journal article supplement (doi:10.3390/molecules27041452), 2022-02-21
Supplement: s1 [file s1]

# Supplementary Figure S1

**Supplementary Figure S1:** (A) SDS Page for plasma isolated IgG. 2 µg of sample were loaded to each lane of a precasted gel (NuPAGE™ 4-12% Bis-Tris (Invitrogen™ NO0336), run in 1X MOPS (Invitrogen™ NP0050) for 1h at 180V for 60min and subsequently Coomassie stained (Invitrogen™ SimplyBlue™ SafeStain). (B) sample loading scheme, obtained IgG concentration after purification and respective group of the loaded sample are given.

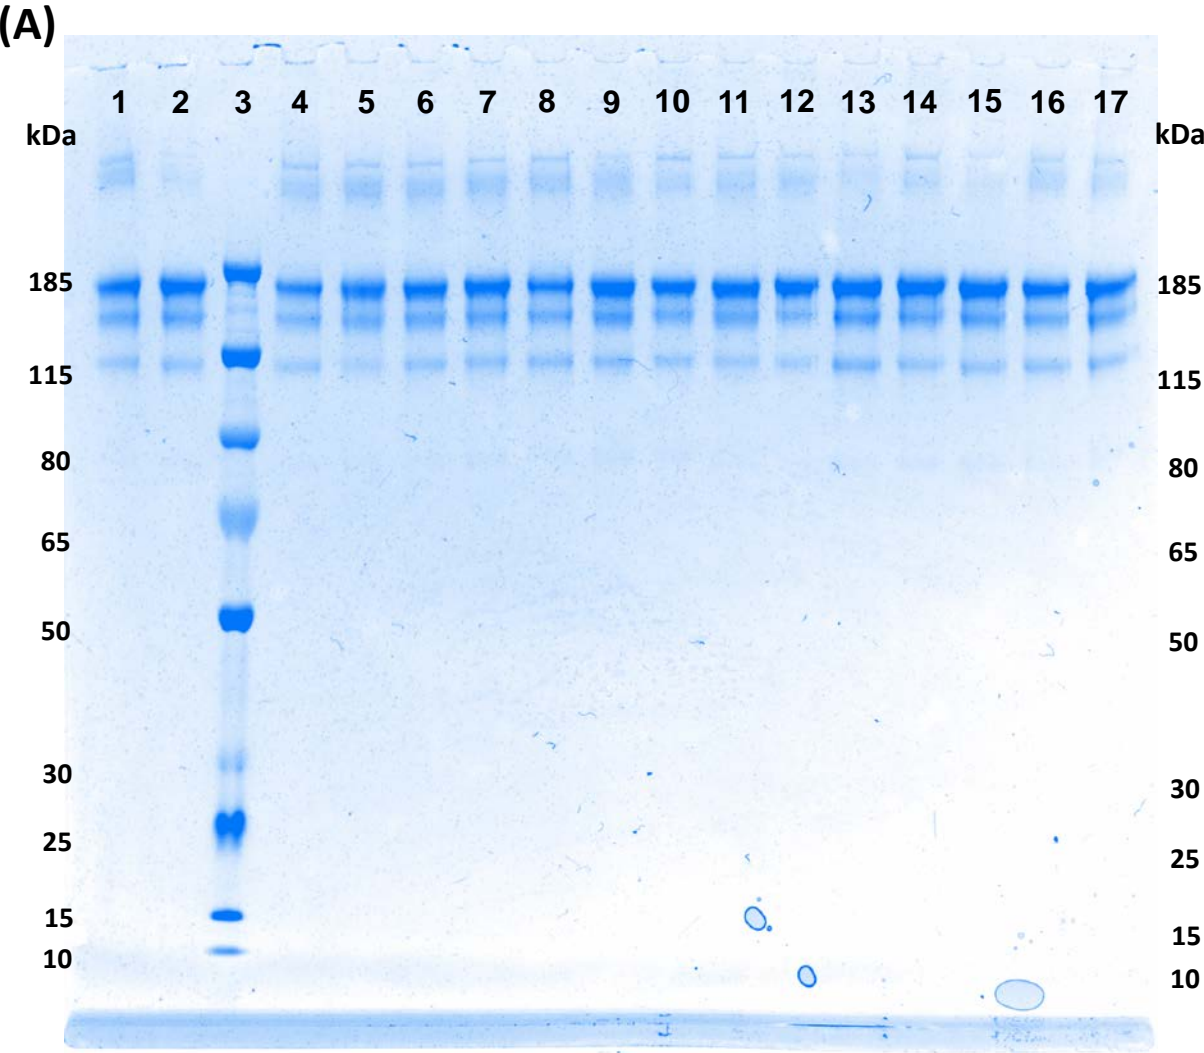

**(B)**

| Lane | mg/mL                     | group           |
|------|---------------------------|-----------------|
| 1    | 1.1                       | seronegative RA |
| 2    | 1.1                       | healthy         |
| 3    | ladder (NuPageRuler plus) |                 |
| 4    | 1.03                      | osteoarthritis  |
| 5    | 1.02                      | healthy         |
| 6    | 2                         | healthy         |
| 7    | 1.03                      | seronegative RA |
| 8    | 1.98                      | seropositive RA |
| 9    | 1.02                      | seropositive RA |
| 10   | 0.99                      | seronegative RA |
| 11   | 0.99                      | healthy         |
| 12   | 1.07                      | seronegative RA |
| 13   | 1.1                       | seropositive RA |
| 14   | 1.01                      | osteoarthritis  |
| 15   | 1.09                      | healthy         |
| 16   | 1.02                      | seronegative RA |
| 17   | 1.05                      | seropositive RA |

2 µg sample loaded per lane
