# Supplementary material for: Functional Analysis of Autoantibody Signatures in Rheumatoid Arthritis
Source: MDPI journal article supplement (doi:10.3390/molecules27041452), 2022-02-21

**Supplemental Figure S3: A)** involvement of antigens with significant positive CDAI correlation in *Metabolism of RNA pathway* (for each of the sub-pathways, the number of hits and the respective FDR are given) as extracted from Reactome pathway browser [9].

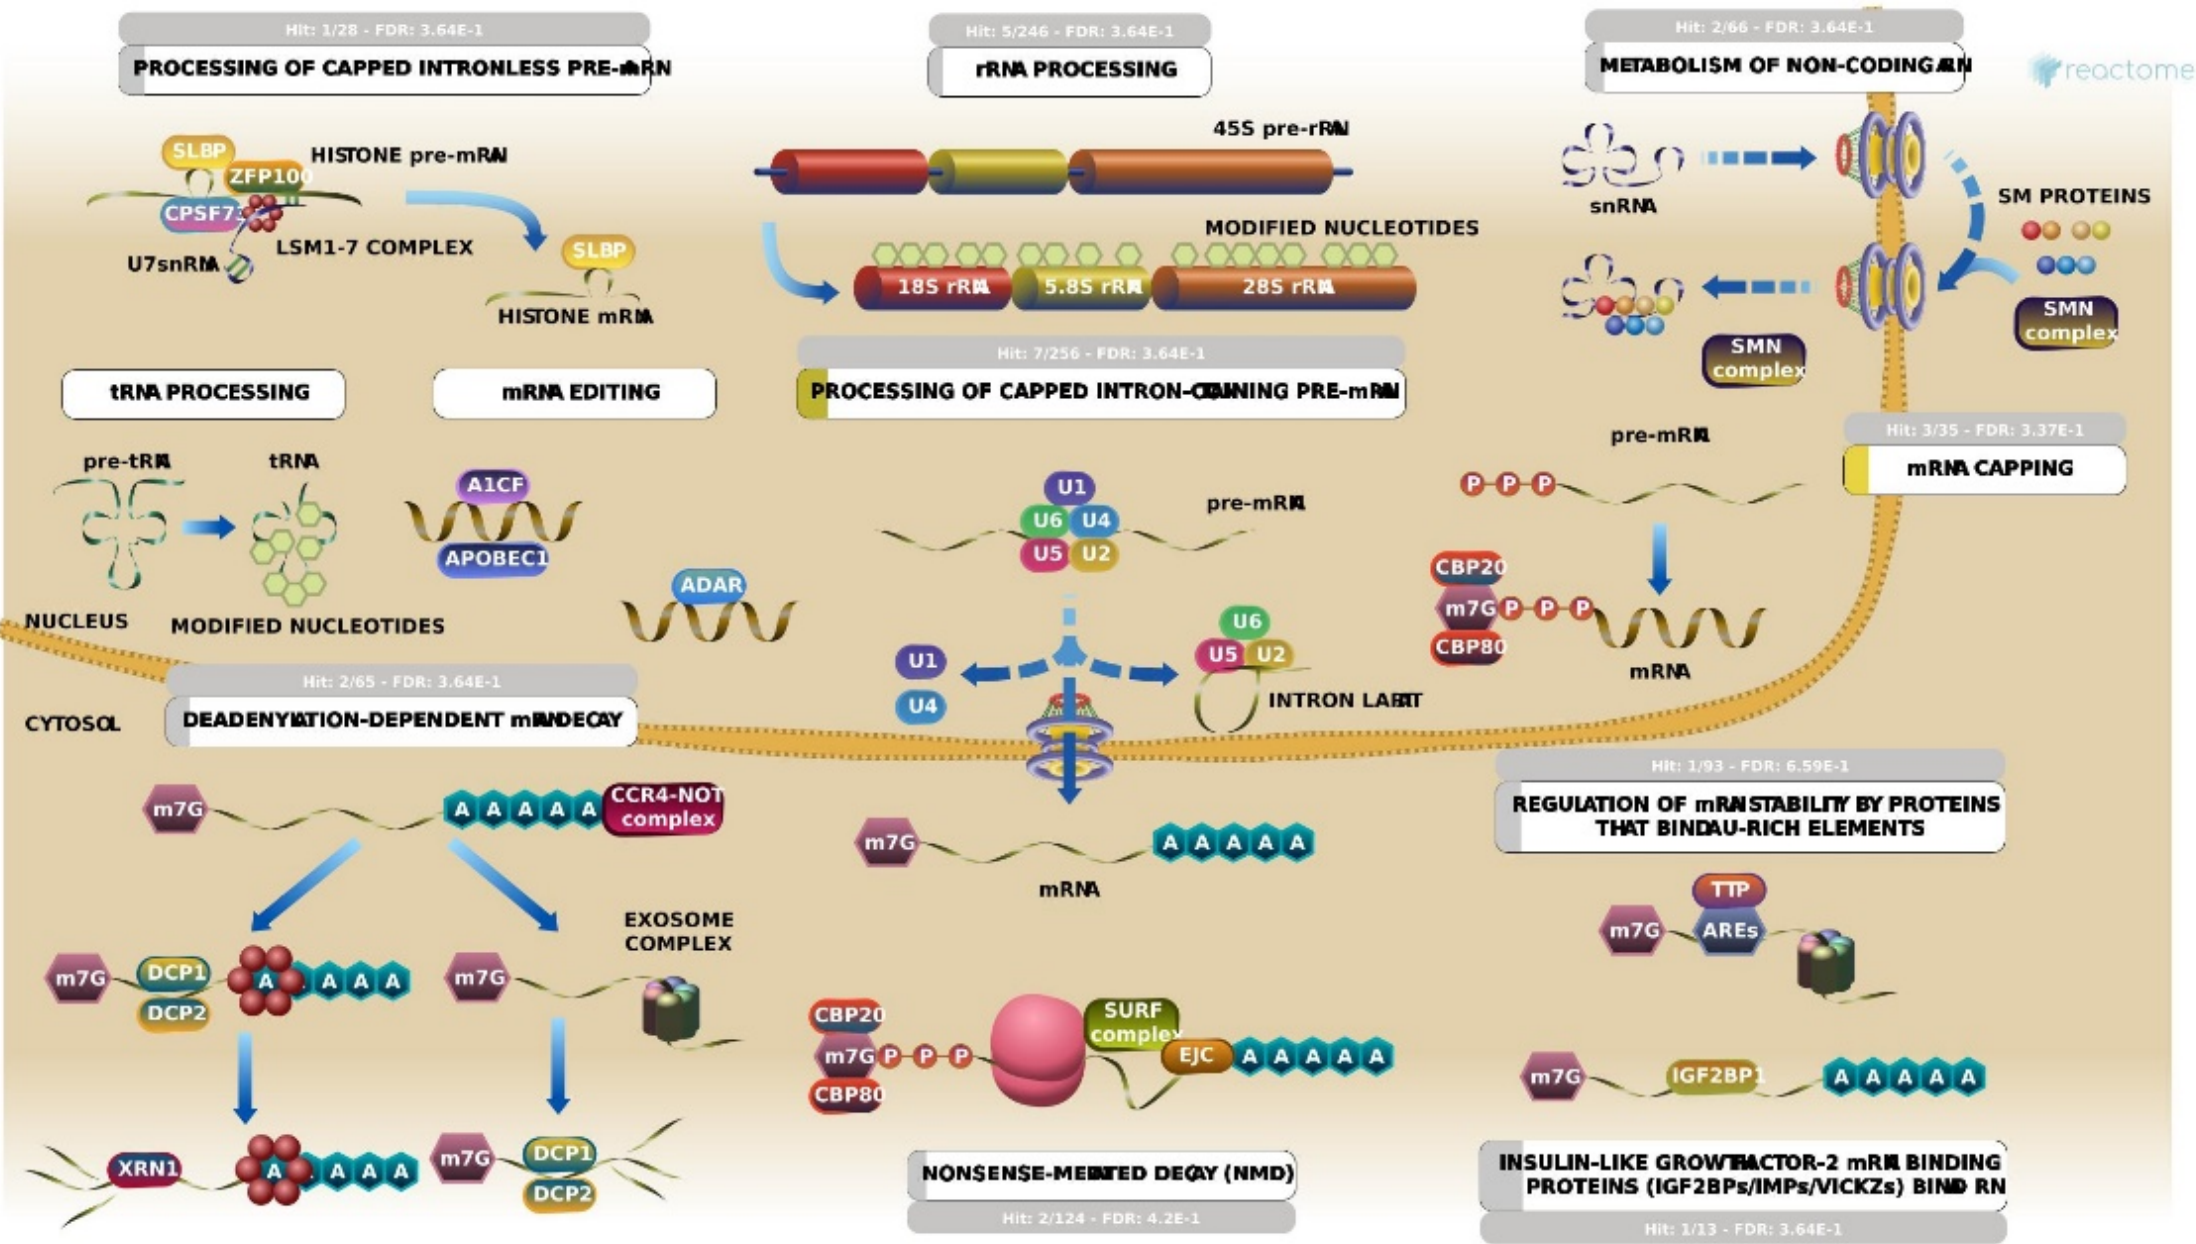

**SUPPLEMENTAL Figure S3: B)** the top pathway of antigens with significant positive CDAI correlation: *Class I MHC mediated antigen processing & presentation* as extracted from Reactome pathway browser [9].

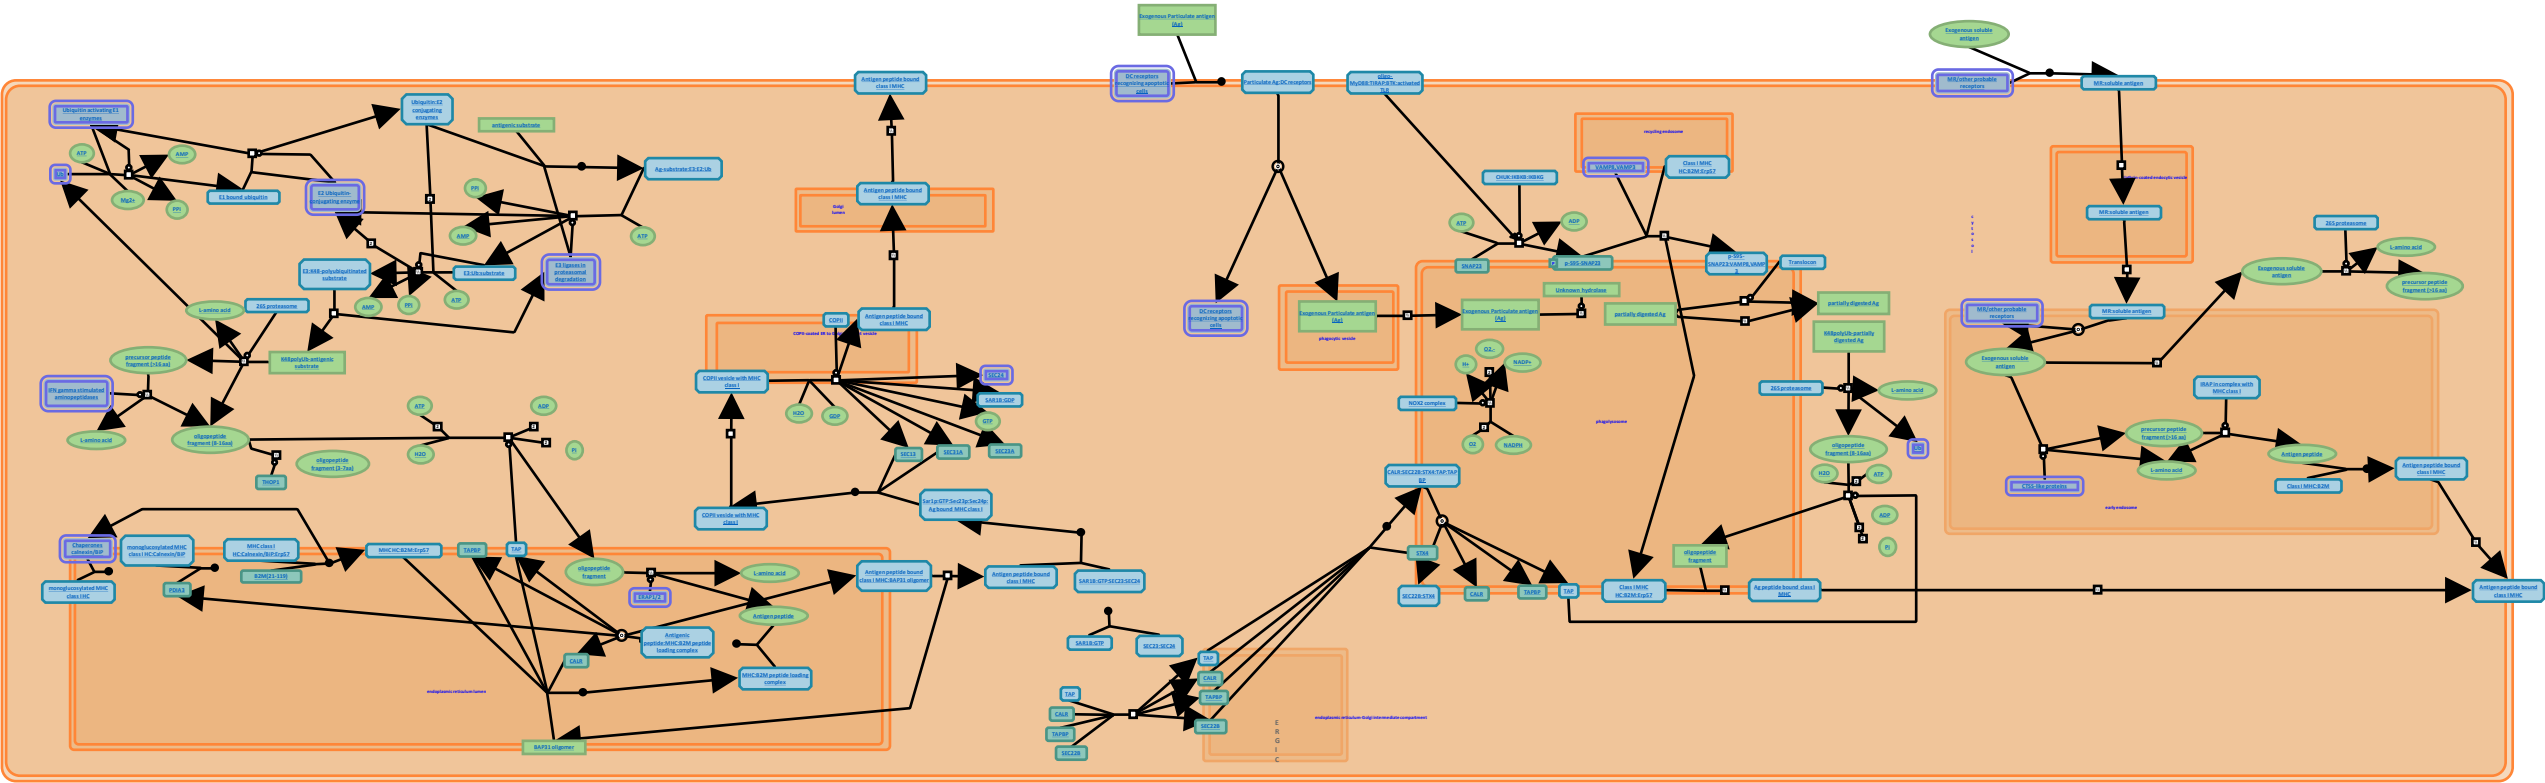

Supplement: s1 [file s1]
